1 **Title: Decreased adaptation at human disease genes as a possible consequence of**  
2 **interference between advantageous and deleterious variants**

3

4 **Authors**

5 Chenlu Di<sup>1</sup>, Diego Salazar Tortosa<sup>1</sup>, M. Elise Lauterbur<sup>1</sup> and David Enard<sup>1</sup>

6

7 **Affiliation**

8 <sup>1</sup> University of Arizona Department of Ecology and Evolutionary Biology, Tucson, Arizona,  
9 USA.

10

11 **Corresponding author**

12 David Enard, [denard@email.arizona.edu](mailto:denard@email.arizona.edu)

13

14

15

16

17

18

19

20

21

22

23

24

25

26

27

28

29

30

31

32

33  
34  
35  
36  
37  
38  
39  
40  
41  
42  
43  
44  
45  
46  
47  
48  
49  
50  
51  
52  
53  
54  
55  
56  
57  
58  
59  
60  
61  
62

## **Abstract**

**Advances in genome sequencing have dramatically improved our understanding of the genetic basis of human diseases, and thousands of human genes have been associated with different diseases. Despite our expanding knowledge of gene-disease associations, and despite the medical importance of disease genes, their evolution has not been thoroughly studied across diverse human populations. In particular, recent genomic adaptation at disease genes has not been well characterized, even though multiple evolutionary processes are expected to connect disease and adaptation at the gene level. Understanding the relationship between disease and adaptation at the gene level in the human genome is severely hampered by the fact that we don't even know whether disease genes have experienced more, less, or as much adaptation as non-disease genes during recent human evolution. Here, we compare the rate of strong recent adaptation in the form of selective sweeps between disease genes and non-disease genes across 26 distinct human populations from the 1,000 Genomes Project. We find that disease genes have experienced far less selective sweeps compared to non-disease genes during recent human evolution. This sweep deficit at disease genes is particularly visible in Africa, and less visible in East Asia or Europe, likely due to more intense genetic drift in the latter populations creating more spurious selective sweeps signals. Investigating further the possible causes of the sweep deficit at disease genes, we find that this deficit is very strong at disease genes with both low recombination rates and with high numbers of associated disease variants, but is inexistant at disease genes with higher recombination rates or lower numbers of associated disease variants. Because recessive deleterious variants have the ability to interfere with adaptive ones, these observations strongly suggest that adaptation has been slowed down by the presence of interfering recessive deleterious variants at disease genes. These results clarify the evolutionary relationship between disease genes and recent genomic adaptation, and suggest that disease genes suffer not only from a higher load of segregating deleterious mutations, but also an inability to adapt as much, and/or as fast as the rest of the genome.**

63 **Keywords:** adaptation, human disease, Hill–Robertson interference, recessive deleterious  
64 variants, selective sweeps, environmental changes

## 65 **Introduction**

66 Advances in genome sequencing have dramatically improved our understanding of the genetic  
67 basis of human diseases, and thousands of human genes have been associated with different  
68 diseases (Amberger et al., 2019; Piñero et al., 2020). Despite our expanding knowledge of gene-  
69 disease associations, and despite the fact that multiple evolutionary processes might connect  
70 disease and genomic adaptation at the gene level, these connections are yet to be studied.

71 Different evolutionary processes have the potential to make the occurrence of disease genes and  
72 adaptation not independent from each other in the human genome. For instance, hitchhiking of  
73 deleterious mutations linked to advantageous mutations might increase the risk of disease-  
74 causing variants at genes subjected to past directional adaptation. Disease genes might then  
75 appear to have experienced more adaptation than non-disease genes if this specific process was  
76 sufficiently widespread. Conversely, higher evolutionary constraint, and higher pleiotropy might  
77 reduce adaptation at disease genes compared to genes not involved in diseases (Otto, 2004).

78 There is currently considerable uncertainty about how any of these non-exclusive evolutionary  
79 processes, or other processes, might have influenced adaptation at disease genes. It is even not  
80 well-known whether human non-infectious disease genes have similar, higher or lower levels of  
81 adaptation in human populations compared to genes not involved in diseases. Comparing levels  
82 of adaptation between disease genes and non-disease genes is a first important step toward better  
83 understanding the evolutionary relationship between non-infectious diseases and genomic  
84 adaptation.

85  
86 Multiple recent studies comparing evolutionary patterns between human disease and non-  
87 disease genes have found that disease genes are more constrained and evolve more slowly (lower  
88 ratio of nonsynonymous to synonymous substitution rate,  $dN/dS$ , in disease genes) (Blekhman et  
89 al., 2008; Park et al., 2012; Spataro et al., 2017). An older comparison by Smith and Eyre-Waler  
90 (2003) found that disease genes evolve faster than non-disease genes (higher  $dN/dS$ ), but we note  
91 that the sample of disease genes used at the time was very limited.

92

93           The significant increase of the number of known disease genes since these studies were  
94 completed makes it important to update the comparison of evolutionary patterns at disease and  
95 non-disease genes. More critically however, past studies all have in common an important  
96 limitation that justifies comparing disease genes and non-disease genes again. Disease and non-  
97 disease genes may differ by more than just the fact that they have been associated with disease or  
98 not. Disease and non-disease genes may also differ in many other factors other than their disease  
99 status. Such factors can be a problem when comparing adaptation in disease genes and non-  
100 disease genes, because they, instead of the disease status itself, could explain differences in  
101 adaptation. For example, disease genes tend to be more highly expressed than non-disease genes  
102 (Spataro et al., 2017) (Figure 1). If higher expression happens to be associated with more  
103 adaptation in general, one might detect more adaptation in disease genes in a way that has  
104 nothing to do with disease, and just reflects their higher levels of expression. Many other factors  
105 may also be important. For example, immune genes, which often adapt in response to infectious  
106 pathogens, may further complicate comparisons if they are represented in unequal proportions  
107 between non-infectious disease and non-disease genes. Comparing genomic adaptation in disease  
108 and non-disease genes thus requires careful consideration of confounding factors.

109  
110  
111  
112  
113  
114  
115  
116  
117  
118  
119  
120  
121  
122  
123

124

125

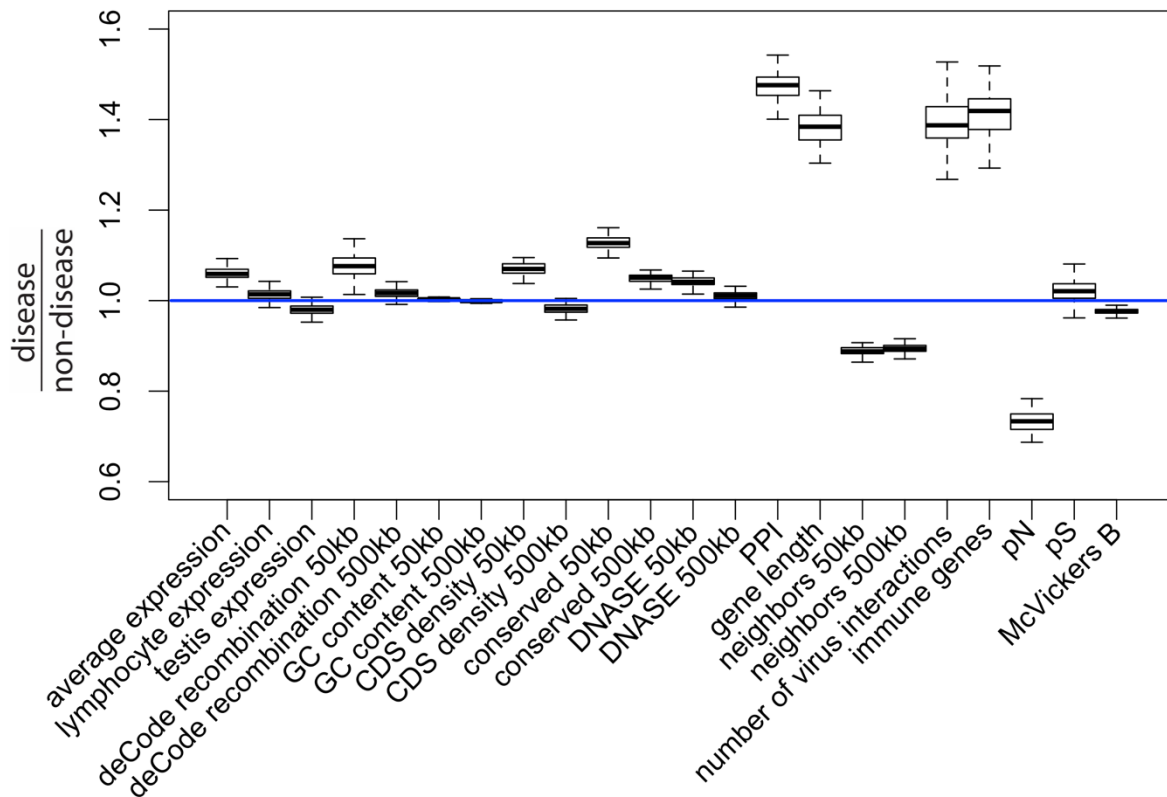

126

127 **Figure 1. Potential confounding factors in disease versus non-disease genes.**

128 Each potential confounding factor is detailed in the Methods. For each confounding factor, the  
129 boxplot shows on the y-axis the ratio of the average factor value for disease genes, divided by the  
130 average factor value for non-disease genes. The boxplot error bars are obtained by calculating  
131 the ratio 1,000 times, each time by randomly sampling as many non-disease genes as there are  
132 disease genes.

133

134

135 Among other confounding factors, it is particularly important to take into account  
136 evolutionary constraint, i.e the level of purifying selection experienced by different genes. A  
137 common intuition is that disease genes may exhibit less adaptation because they are more  
138 constrained (Blekhman et al., 2008), leaving less mutational space for adaptation to happen in  
139 the first place. Less adaptation at disease genes might thus represent a trivial consequence of  
140 varying constraint between genes (Kim et al., 2007), which says little about a specific connection

141 between disease and adaptation. In the same vein, one might expect disease genes to be  
142 associated with higher mutation rates, and more frequent adaptation to follow as a trivial  
143 consequence of elevated mutation rates. Whether disease genes experience higher mutation rates  
144 is however still an open question (Osada et al., 2009; Eyre-Walker and Eyre-Walker, 2014). In  
145 any case, focusing specifically on disease and adaptation requires controlling for confounders  
146 such as constraint and mutation rate (see Methods, Results and Figure 1 for a complete list of  
147 confounders accounted for in this analysis).

148

149 A specific evolutionary relationship may exist between adaptation and disease beyond the  
150 simple effect of constraint, mutation rate or other confounders. In an evolutionary context, once  
151 constraint and other confounding factors have been accounted for, we can imagine three potential  
152 scenarios for the comparison of adaptation between disease and non-disease genes. Under  
153 scenario 1, any potential difference in adaptation between disease and non-disease genes is  
154 entirely due to differences in constraint and other confounding factors. Under this scenario, there  
155 is no further evolutionary process linking disease and adaptation together. Therefore, there is no  
156 difference in adaptation between disease and non-disease genes once confounding factors have  
157 been accounted for.

158

159 Under scenario 2, disease genes have more adaptation than non-disease genes. For  
160 example, as already mentioned above, deleterious mutations can hitchhike together with adaptive  
161 mutations to high frequencies in human populations (Birky and Walsh, 1988; Barreiro and  
162 Quintana-Murci, 2010; Chun and Fay, 2011). Other, less well established, cases can be imagined  
163 where past adaptation decreased the robustness of a specific gene, and subsequent mutations  
164 become more likely to be associated with diseases (Xu and Zhang, 2014). Scenario 2 thus favors  
165 a relationship between adaptation and disease, where past adaptation precedes and influences the  
166 likelihood of a gene being associated with disease.

167 Under scenario 3, disease genes have less adaptation than non-disease genes even after  
168 accounting for confounding factors such as evolutionary constraint. Such a scenario might occur  
169 for example if disease genes happen to be genes that can be sensitive to changes in the  
170 environment, with a fitness optimum that can change over time, but where adaptation has not  
171 occurred yet to catch up with the new optimum. Such an adaptation lag (or lag load, to reuse the

172 terminology introduced by J. Maynard-Smith (1976)) may occur for example if higher pleiotropy  
173 at disease genes (Ittisoponpisan et al., 2017) makes it less likely for new mutations to be  
174 advantageous (Otto, 2004) (in addition to increasing the level of constraint already accounted for  
175 as a confounding factor). Such an adaptation lag, with genes further away from their optimum,  
176 might make such genes more prone to accumulate disease variants that fall too far from the  
177 “normal” functioning range around the optimum. An adaptation lag may also occur if deleterious  
178 mutations interfere with and slow down adaptation at disease genes more than at non-disease  
179 genes (Assaf et al., 2015; Hill and Robertson, 1966).

180         Even though uncovering the underlying evolutionary processes that govern the  
181 relationship between disease and adaptation will take a lot more work than the present analysis, it  
182 is important to find first which scenario is the most likely to be true, i.e whether disease genes  
183 have as much, more, or less adaptation than non-disease genes. Finding out which out of the  
184 three possible scenarios is true may give a preliminary basis to further hypothesize which  
185 evolutionary processes are more likely to dominate the relationship between disease and  
186 adaptation genome-wide.

187  
188         Here, we compare recent adaptation in mendelian disease and non-disease genes in order  
189 to disentangle the connections between adaptation and disease. We specifically compare the  
190 abundance of recent selective sweeps signals, where hitchhiking has raised haplotypes that carry  
191 an advantageous variant to higher frequencies (Smith and Haigh, 1974). Note that this means that  
192 we can only compare adaptation at specific loci between disease and non-disease genes that was  
193 strong enough to induce hitchhiking, hence we do not take into account polygenic adaptation  
194 distributed across a large number of loci that did not leave any hitchhiking signals (see  
195 Discussion). As mentioned above, confounding factors may affect the comparison between  
196 disease and non-disease genes. In contrast with previous studies, we systematically control for a  
197 large number of confounding factors when comparing recent adaptation in human disease and  
198 non-disease genes, including evolutionary constraint, mutation rate, recombination rate, the  
199 proportion of immune or virus-interacting genes, etc. (please refer to Methods for a full list of the  
200 confounding factors included). In addition to controlling for a large number of confounding  
201 factors, we estimate false positive risks (FPR) for our comparison pipeline that fully take into  
202 account the implications of controlling for many factors (see Methods and Results).

203 As a list of disease genes to test, we curate human mendelian non-infectious disease  
204 genes based on annotations in the DisgeNet and OMIM databases (Methods). We focus on  
205 mendelian disease genes rather than all disease genes including complex disease associations,  
206 because different evolutionary patterns can be expected between mendelian and complex disease  
207 genes based on previous studies (Blekhman et al., 2008; Quintana-murci, 2016; Spataro et al.,  
208 2017). In total, we compare 4,215 mendelian disease genes with non-disease genes in the human  
209 genome. In agreement with scenario 3, we find a strong deficit of selective sweeps at disease  
210 genes compared to non-disease genes. We further test multiple potential explanations for this  
211 deficit, and find that higher pleiotropy at disease genes is unlikely to explain the less frequent  
212 occurrence of sweeps. In contrast, we find that the sweep deficit at disease genes strongly  
213 depends on recombination and the number of known disease variants at given disease genes.  
214 This suggests that segregating deleterious mutations at disease genes might interfere with, and  
215 slow down genetically linked adaptive variants enough to produce the observed lack of sweeps at  
216 disease genes.

217

## 218 **Results**

219

### 220 **Controlling for confounding factors with a bootstrap test**

221 To compare disease and non-disease genes, we first ask which potential confounding factors  
222 differ between the two groups of genes. As expected, multiple measures of selective constraint  
223 are significantly higher in disease compared to non-disease genes. As a measure of long-term  
224 constraint, the density of conserved elements across mammals is slightly higher at disease genes  
225 compared to non-disease genes (Figure 1: conserved 50kb, conserved 500kb; Methods).  
226 As a measure of more recent constraint, we contrast pS, the average proportion of variable  
227 synonymous sites, with pN, the average proportion of variable nonsynonymous sites (Figure 1;  
228 Methods). If the coding sequences of disease genes are more constrained, we expect a drop of pN  
229 at disease genes, but no such drop of pS at neutral synonymous sites. Accordingly, pN is lower at  
230 disease compared to non-disease genes, while pS is very similar between the two categories of  
231 genes (Figure 1). Therefore, selective constraint was stronger in the coding sequences of disease  
232 genes during recent human evolution.



233 As another measure of recent constraint, we also use McVicker's B estimator of background  
234 selection (McVicker et al., 2009). The amount of background selection at a locus can be used as  
235 a proxy for recent constraint, since it depends on the number of deleterious mutations that were  
236 recently removed at this locus. The lower B, the more background selection there is at a specific  
237 locus. In line with higher recent constraint at disease genes, B is slightly, but significantly lower  
238 at disease genes (Figure 1; Methods). Overall, we find evidence of higher constraint at disease  
239 genes.

240  
241 In addition to constraint, mutation rate could represent an important confounder. The proportion  
242 of variable neutral synonymous sites  $pS$  can be used to compare mutation rates, since the number  
243 of variable sites is proportional to the mutation rate under neutrality. As mentioned already,  $pS$  is  
244 very similar at disease and non-disease genes (Figure 1), suggesting that mutation rates are  
245 similar at disease and non-disease genes. This is further supported by the fact that multiple  
246 factors that could affect the mutation rate such as GC content or recombination are also similar at  
247 disease and non-disease genes (Figure 1; Methods). Aside from mutation rate and constraint,  
248 multiple other factors that could affect adaptation differ between disease and non-disease genes,  
249 notably including the proportion of genes that interact with viruses, the proportion of immune  
250 genes, or the number of protein-protein interactions (PPIs) in the human PPIs network. All these  
251 factors have been shown to affect adaptation (Methods), further showing the necessity to control  
252 for confounding factors when comparing adaptation at disease and non-disease genes.

253

#### 254 **Less sweeps at disease genes**

255 For our comparison of disease and non-disease genes, we measure recent adaptation  
256 around human protein coding genes (Methods) using the integrated haplotype score (iHS,  
257 (Voight et al., 2006)) and the number of Segregating sites by Length ( $nS_L$ , (Ferrer-Admetlla et  
258 al., 2014)) in 26 populations (The 1000 Genomes Project Consortium, 2015) (Methods). The iHS  
259 and  $nS_L$  statistics are both sensitive to recent incomplete sweeps, and have the advantage over  
260 other sweep statistics of being insensitive to the confounding effect of background selection  
261 (Enard et al., 2014; Schrider, 2020). To evaluate the prevalence of sweeps at disease genes  
262 relative to non-disease genes, we do not use the classic outlier approach, and instead used a  
263 previously described, more versatile approach based on block-randomized genomes to estimate

264 unbiased false positive risks for whole enrichment curves (Figure 2) (Enard and Petrov, 2020).  
265 We first rank genes based on the average  $iHS$  or  $nS_L$  in genomic windows centered on genes  
266 (Methods), from the top-ranking genes with the strongest sweep signals to the genes with the  
267 weakest signals. We then slide a rank threshold from a high rank value to a low rank value (from  
268 top 5,000 to top 10, x-axis on Figure 2). For each rank threshold, we estimate the sweep  
269 enrichment (or deficit) at disease relative to non-disease genes (Figure 2, y-axis). For example,  
270 for rank threshold 200, the relative enrichment (or deficit) is the number of disease genes in the  
271 top 200 ranking genes, divided by the number of control non-disease genes in the top 200. By  
272 sliding the rank threshold, we estimate a whole enrichment curve that is not only sensitive to the  
273 strongest sweeps but also to weaker sweeps signals (for example using the top 5,000 threshold;  
274 Figure 2). Using block-randomized genomes (Methods), we can then estimate an unbiased false  
275 positive risk (FPR) for the whole enrichment curve. This strategy makes less assumptions on the  
276 expected strength of selective sweeps. The approach also makes it possible to estimate a single  
277 false positive risk based on the cumulated enrichment (or deficit) over multiple whole  
278 enrichment curves (Methods). Here, we estimate a single false positive risk for both  $iHS$  and  $nS_L$   
279 curves considered together, and also for multiple window sizes to measure average  $iHS$  and  $nS_L$   
280 (from 50kb to 1Mb, Methods).

281  
282 To control for confounding factors (Figure 1), we compare sweep signals at disease genes with  
283 control non-disease genes that were chosen by a bootstrap test (Castellano et al., 2019; Enard and  
284 Petrov, 2020) because they match disease genes in terms of confounding factor values  
285 (Methods). Furthermore, control non-disease genes are chosen far from disease genes ( $>300\text{kb}$ ;  
286 Methods). We do this to avoid choosing as controls non-disease genes that are too close to  
287 disease genes and thus likely to have the same sweep profile (especially in the case of large  
288 sweeps potentially overlapping both neighboring disease and non-disease genes). This, together  
289 with the large number of confounding factors that we match, tends to limit the pool of possible  
290 control genes (Methods). The statistical impact of a limited control pool is however fully taken  
291 into account by the estimation of a FPR with block-randomized genomes (Methods).

292  
293 Because they have experienced different demographic histories, we test different human  
294 populations from distinct continents separately. Specifically, we test African populations, East

295 Asian populations and European populations from the 1,000 Genomes Project phase 3 (The 1000  
296 Genomes Project Consortium, 2015). At this stage we must consider the fact that most gene-  
297 disease associations in our dataset were likely discovered in European cohorts. Because disease  
298 genes in Europe may not always be disease genes in other populations, we cannot exclude the  
299 possibility that a sweep enrichment or a sweep deficit might be more pronounced in Europe,  
300 unless the evolutionary processes that make a gene more likely to be a disease gene predated the  
301 split of different human populations. Conversely, one might expect distinct selective patterns  
302 between disease and non-disease genes to be more visible in Africa. Indeed, more intense drift,  
303 due to the more severe bottlenecks experienced by ancestral Eurasian populations (The 1000  
304 Genomes Project Consortium, 2015), is expected to dilute true selective patterns among false  
305 positive signals more in Europe and East Asia, by creating a higher base level of drift noise.  
306

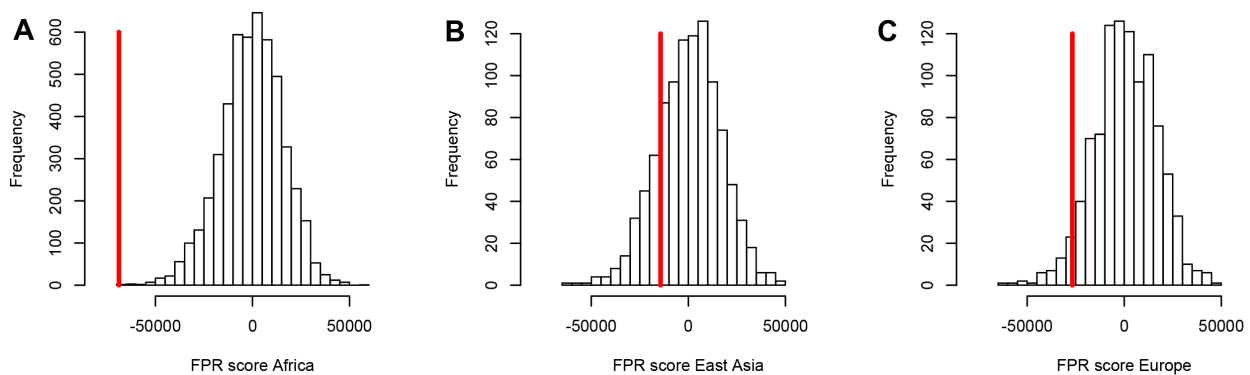

307  
308 **Figure 2. A stronger sweep deficit at disease genes in Africa than in East Asia and Europe.**  
309 The figure shows the observed sweep enrichment/deficit score used to measure the false positive  
310 risk (FPR) in the real genome (red line), compared to the expected null distribution of the score  
311 estimated with block-randomized genomes (5,000 block-randomized genomes in Africa, 1,000 in  
312 East Asia and Europe; Methods). The FPR score is based on summing the difference between the  
313 number of genes in sweeps at disease genes and the number of genes in sweeps in control genes,  
314 over both  $iHS$  and  $nS_L$ , and different window sizes (Methods). A) FPR score in Africa, estimated  
315 summing over the ESN, GWD, LWK, MSL and YRI populations from the 1,000 Genomes  
316 Project. B) FPR score in East Asia, estimated summing over the CDX, CHB, CHS, JPT and  
317 KHV populations. C) FPR score in Europe, summing over the CEU, FIN, GBR, IBS and TSI  
318 populations.  
319

320  
321 Using both  $iHS$  and  $nS_L$  sweep signals, we find a strong depletion in sweep signals at disease  
322 genes, especially in Africa with a low false positive risk (FPR=3.10<sup>-4</sup> vs. 0.18 in East Asia and  
323 0.05 in Europe, Figure 2A, B and C respectively; Methods). Note that this FPR takes the

324 clustering of multiple genes in the same sweeps into account (Enard and Petrov, 2020). A  
325 stronger depletion in Africa suggests that the evolutionary processes linking disease and  
326 adaptation at the gene level predate the split of African and European populations, given that  
327 most gene-disease associations studies involved European cohorts. The stronger depletion in  
328 Africa also suggests that the same pattern might be present outside of Africa, but more hidden by  
329 genetic drift noise. It might indeed be harder to distinguish a deficit of true sweep signals at  
330 disease genes if it is swamped by an elevated level of false sweep signals occurring at random in  
331 the genome, due to more intense drift. Figure 3A, B and C show the sweep deficit curves at  
332 disease genes compared to control non-disease genes in Africa, East Asia and Europe,  
333 respectively.

334  
335

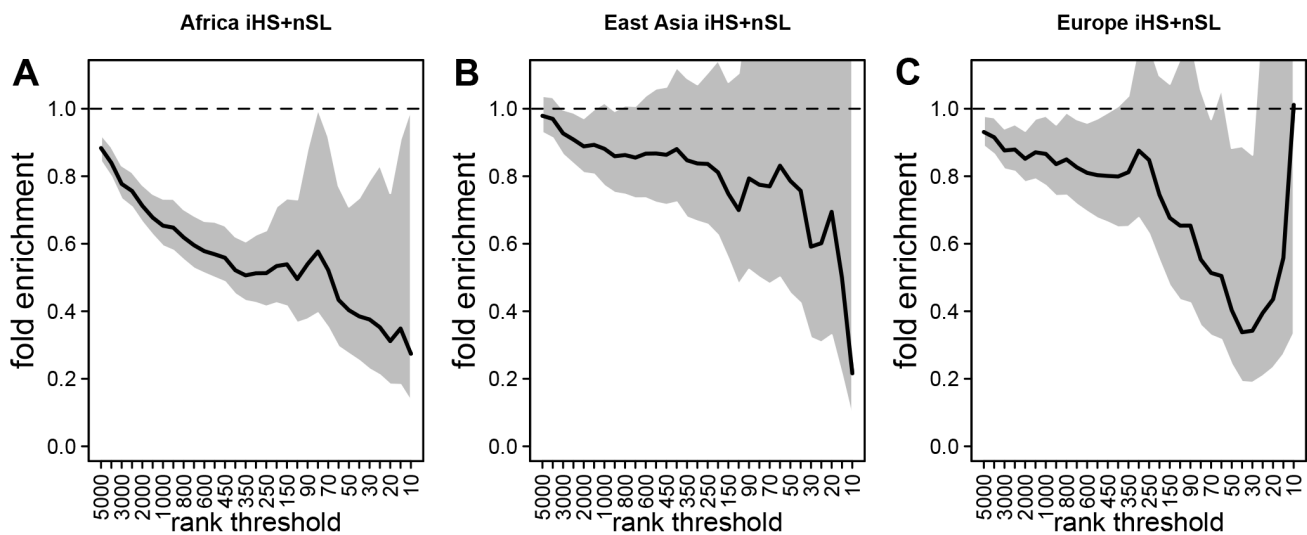

337

### 337 **Figure 3. Deficit of $iHS$ and $nS_L$ sweep signals at disease genes.**

338 The figure shows the averaged whole enrichment curves and their averaged confidence intervals  
339 from the bootstrap test, averaged over both  $iHS$  and  $nS_L$  sweep ranks, and over all the  
340 populations from each continent (Methods). The y-axis represents the relative sweep enrichment  
341 at disease genes, calculated as the number of disease genes in putative sweeps, divided by the  
342 number of control non-disease genes in putative sweeps. The gray areas are the 95% confidence  
343 interval for this ratio. The number of genes in putative sweeps is measured for varying sweep  
344 rank thresholds. For example, at the top 100 rank threshold, the relative enrichment is the  
345 number of disease genes within the top 100 genes with the strongest sweep signals (either  
346 according to  $iHS$  or  $nS_L$ ), divided by the number of control non-disease genes within the top 100  
347 genes with the strongest sweep signals. We use genes ranked by  $iHS$  or  $nS_L$  using 200kb  
348 windows, since 200kb is the intermediate size of all the window sizes we use (50kb, for the  
349 smallest, 1000kb for the largest; see Methods). A) Africa, average over the ESN, GWD, LWK,

350 MSL and YRI populations from the 1,000 Genomes Project. B) East Asia, average over the  
351 CDX, CHB, CHS, JPT and KHV populations. C) Europe, average over the CEU, FIN, GBR, IBS  
352 and TSI populations.

353

354 Notably, the stronger depletion observed in Africa likely excludes the possibility that it could be  
355 mostly due to a technical artifact, where sweeps themselves might make it harder to identify  
356 disease genes in the first place. Sweeps increase linkage disequilibrium (LD) in a way that could  
357 make it more difficult to assign a disease to a single gene in regions of the genome with high LD  
358 and multiple genes genetically linked to a disease variant. This could result in a depletion of  
359 sweeps at monogenic disease genes, simply because disease genes are less well annotated in  
360 regions of high LD. However, if this was the case, because most disease gene were identified in  
361 Europe, we would expect such an artifact to deplete sweeps at disease genes primarily in Europe,  
362 not in Africa. This artifact is also very unlikely due to the fact that recombination rates are  
363 similar between disease and non-disease genes (Figure 1). Overall, these results support the third  
364 scenario where evolutionary processes decrease adaptation at disease genes. That said, it is  
365 important to note that we only detect a deficit of adaptation strong enough to leave hitchhiking  
366 signals. Our results do not imply that the same is true for adaptation that is too polygenic to leave  
367 signals detectable with  $iHS$  or  $nS_L$ . Note that the sweep deficit at disease genes in Africa is  
368 robust to differences in gene functions between disease and non-disease genes according to a  
369 Gene Ontology analysis (Methods) (Gene Ontology Consortium, 2021).

370

### 371 **A limited role of pleiotropy**

372 A deficit of strong adaptation (strong enough to affect  $iHS$  or  $nS_L$ ) raises the question of what  
373 creates this deficit at disease genes. Because disease genes tend to be pleiotropic and many  
374 disease genes are involved in multiple diseases (see below), pleiotropy is a particularly attractive  
375 potential explanation for the lack of sweeps at disease genes. Pleiotropy is defined as the ability  
376 for a gene to affect multiple phenotypes. The involvement in multiple phenotypes may make it  
377 more difficult for mutations to emerge at pleiotropic genes without any adverse antagonistic  
378 effects (Otto, 2004). In addition to the higher selective constraint already accounted for,  
379 pleiotropy may thus also make it less likely for advantageous mutations to be advantageous and  
380 cause a sweep (Otto, 2004), with the advantage provided by changes at specific phenotypes  
381 being mitigated by the adverse effects on other phenotypes.

382 We can test the involvement of pleiotropy with our dataset by comparing sweeps at disease  
383 genes involved in multiple diseases, with sweeps at disease genes involved in only one disease.  
384 If pleiotropy decreases the rate of sweeps at disease genes, we predict that genes involved in  
385 multiple diseases should experience less sweeps than genes involved in only one disease.  
386 There are 1221 disease genes in our dataset associated with five or more diseases (five+ disease  
387 genes), and 1296 disease genes associated with only one disease according to the CUI (Concept  
388 Unique Identifiers) classification provided by DisGeNet (Methods). When comparing the five+  
389 disease genes with one disease genes far away (>300 kb as when comparing all disease genes  
390 with control non-disease genes), we do not find significantly less  $iHS$  and  $nS_L$  sweep signals at  
391 five+ disease genes in Africa (FPR=0.46). This result makes it unlikely that pleiotropy can  
392 explain the sweep deficit at disease genes.

393  
394

### 395 **A possible role of interference of deleterious mutations**

396 With pleiotropy likely having a limited role, we further test other possible explanations for the  
397 sweep deficit at disease genes. Another possibility is that adaptation may be limited at disease  
398 genes due to deleterious mutations interfering with and slowing down advantageous variants.  
399 This process has been mostly studied in haploid species (Peck, 1994; Johnson and Barton, 2002;  
400 Jain, 2019). In diploid species including humans, recessive deleterious mutations specifically  
401 have been shown to have the ability to slow down, or even stop the frequency increase of  
402 advantageous mutations that they are linked with (Assaf et al., 2015; Uricchio et al., 2019).  
403 Uricchio et al. (2019) in particular found evidence of decreased protein adaptation in the regions  
404 of the human genome with strong background selection and low recombination. The majority of  
405 disease variants are recessive (Amberger et al., 2019). Thus, if segregating recessive deleterious  
406 mutations are more common at disease genes, starting with the known disease variants  
407 themselves, then their interference could in theory explain the sweep deficit that we observe.  
408 This is true even despite the fact that we matched disease and control non-disease genes for  
409 multiple measures of selective constraint. Indeed, we use measures of selective constraint such as  
410 the density of conserved elements or the proportion of variable non-synonymous sites  $pN$   
411 (Methods), that are indicative of the amount of deleterious mutations that get ultimately  
412 removed, but do not provide any detailed information on either the strength of negative selection,

413 or on dominance coefficients. Disease genes and control non-disease genes may have very  
414 similar densities of conserved elements and similar pN, and still very different distributions of  
415 selection and dominance coefficients of deleterious mutations. Unfortunately, disentangling  
416 selection from dominance coefficients is notoriously difficult, because different combinations of  
417 selection and dominance coefficients can result in the same patterns of genetic variation (Huber  
418 et al., 2018). Although directly comparing the actual total numbers of recessive deleterious  
419 mutations at disease and non-disease genes is therefore not possible, we can still use indirect  
420 comparison strategies. First, if an interference of deleterious mutations is involved, then this  
421 interference is expected to be stronger in low recombination regions of the genome, where more  
422 deleterious mutations are likely to be genetically linked to an advantageous mutation. Therefore,  
423 we predict that the sweep deficit should be more pronounced when comparing disease and non-  
424 disease genes only in low recombination regions of the genome, where the linkage between  
425 deleterious and advantageous variants is higher. Conversely, the sweep deficit should be less  
426 pronounced in high recombination regions of the genome. Second, if the number of known  
427 disease variants at a given disease gene correlates well enough with the total number of  
428 segregating recessive deleterious mutations at this disease gene, then we should observe a  
429 stronger sweep deficit at disease genes with many known disease variants, compared to disease  
430 genes with few known disease variants. Based on these two predictions, the sweep deficit should  
431 be particularly strong at disease genes with both many disease variants AND lower  
432 recombination. As the number of disease variants for each disease gene, we use the number of  
433 disease variants as curated by OMIM/UNIPROT (Methods).

434  
435 For these comparisons we focus solely on African populations for which we found the strongest  
436 sweep deficit (Figure 2). We first compare disease and control non-disease genes both from only  
437 regions of the genome with recombination rates lower than the median recombination rate (1.137  
438 cM/Mb). In agreement with recombination being involved, we find that the sweep deficit at low  
439 recombination disease genes is much more pronounced than the overall sweep deficit found  
440 when considering all disease and control non-disease genes regardless of recombination (Figure  
441 4,  $FPR=2.10^{-4}$ ). Conversely, the sweep deficit at disease genes compared to non-disease genes is  
442 much less pronounced when restricting the comparison to genes with recombination rates higher  
443 than the median recombination rate (1.137 cM/Mb), and remains only marginally significant

444 (Figure 4, FPR=0.029). This provides evidence that genetic linkage may indeed be involved.  
445 Low recombination is however not sufficient on its own to create a sweep deficit, and we further  
446 test if the sweep deficit also depends on the number of disease variants at each disease gene. In  
447 our dataset, approximately half of all the disease genes have five or more disease variants, and  
448 the other half have four or less disease variants (Methods). In further agreement with possible  
449 interference of recessive deleterious variants, the sweep deficit is much more pronounced at  
450 disease genes with five or more disease variants (Figure 4, FPR= $8.10^{-4}$ ). The sweep deficit at  
451 disease genes with four or less disease variants is barely significant compared to control non-  
452 disease genes (Figure 4, FPR=0.032). In addition, disease genes with five or more disease  
453 variants, but with recombination higher than the median recombination rate, do not have a strong  
454 sweep deficit either (Figure 4, FPR=0.026). A higher number of disease variants alone is thus not  
455 enough to explain the sweep deficit. In a similar vein, disease genes with a recombination rate  
456 less than the median recombination rate, and with four or less disease variants, do not exhibit a  
457 strong sweep deficit (Figure 4, FPR=0.021). This confirms that low recombination alone is not  
458 enough to explain the sweep deficit at disease genes. Accordingly, disease genes with both low  
459 recombination AND five or more disease variants show the strongest sweep deficit (Figure 4,  
460 FPR= $2.10^{-4}$ ). Disease genes with both high recombination AND less than 5 disease variants show  
461 no sweep deficit at all, with a sweep prevalence undistinguishable from control non-disease  
462 genes (Figure 4, FPR=0.74). The latter result is important, because it suggests that interference of  
463 recessive deleterious variants may be sufficient on its own to explain the whole sweep deficit at  
464 disease genes. Both higher linkage and more disease variants seem to be needed to explain the  
465 sweep deficit at disease genes. Note that these results are not due to introducing a bias in the  
466 overall number of variants by using the number of disease variants, because we always match the  
467 level of neutral genetic variation between disease genes and control non-disease genes with pS.  
468 The overall level of genetic variation is further matched thanks to pN and thanks to McVicker's  
469 B, whose value is directly dependent on the level of genetic variation at a given locus (McVicker  
470 et al., 2009).

471

472

473



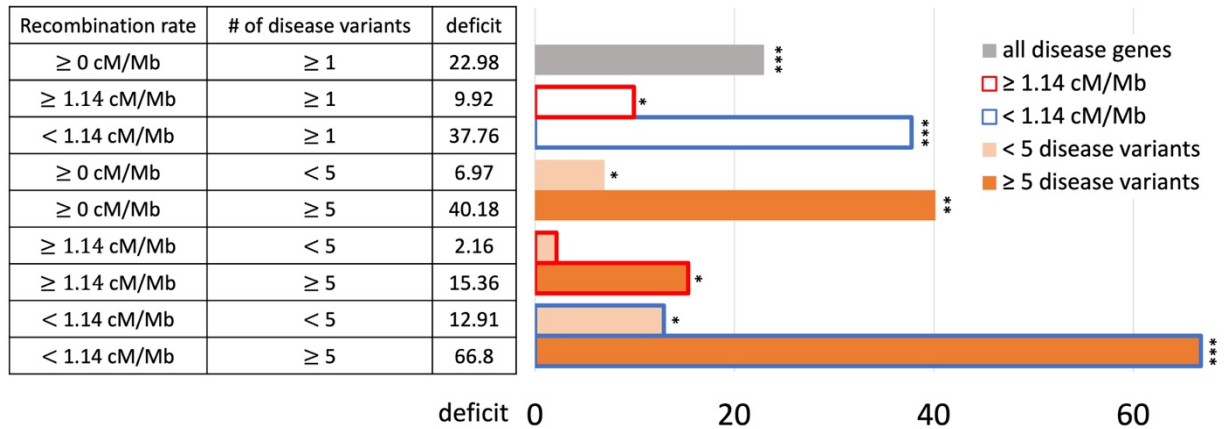

474

475 **Figure 4. Sweep deficit as a function of recombination and disease variants number.**

476 The sweep deficit is measured as the FPR score per gene (to make all tested groups comparable)  
 477 over all window sizes, and  $nS_L$  and  $iHS$ , as in Figure 1 (Methods). The different groups are  
 478 separated according to recombination and numbers of disease variants so that they have  
 479 approximately the same size (a half or a fourth of the disease genes). All deficits are measured  
 480 using only African populations.

481

482

483 **Similar levels of sweep depletion in disease genes across MeSH disease classes**

484 Because we found an overall sweep depletion at disease genes, we further ask if genes associated  
 485 with different diseases might show different patterns of depletion (always in African  
 486 populations). We classify disease genes into different classes according to the Medical Subject  
 487 Headings (MeSH) annotation for diseases in DisGeNet (Piñero et al., 2020). The MeSH  
 488 annotations organize the disease genes into 24 broad disease categories that overlap with distinct  
 489 organs or large physiological systems (for example the endocrine system). We find significant  
 490 ( $FPR < 0.05$ ) sweep depletions for all but one disease MeSH classes ( $FPR < 0.05$ ; Figure 5). The  
 491 sweep deficit is mostly comparable across MeSH disease classes (Figure 5), suggesting that the  
 492 evolutionary process at the origin of the sweep deficit is not disease-specific. This is compatible  
 493 with a non-disease specific explanation such as recessive deleterious variants interfering with  
 494 adaptive variants. The only non-significant deficit is for the MeSH term immune system  
 495 diseases. Interestingly, there is evidence that past adaptation at disease genes in response to  
 496 diverse pathogens has resulted in increased prevalence of specific auto-immune diseases  
 497 (Barreiro and Quintana-Murci, 2010), and we can speculate that this is why we do not see a  
 498 sweep deficit at those genes.

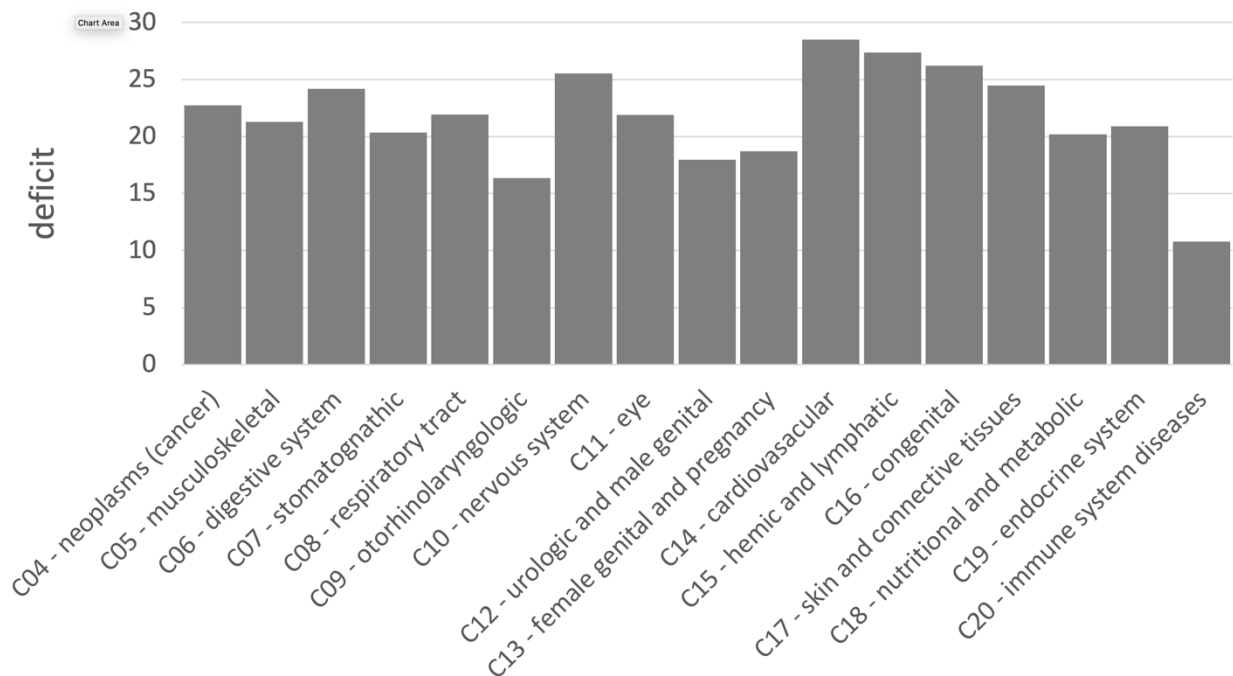

499

500 **Figure 5. Sweep deficit per MeSH disease classes.**

501 The sweep deficit is measured as the overall FPR score per gene (Methods), to make all MeSH  
502 classes comparable even if they include different numbers of genes.

503

504

505 **Discussion:**

506 We found a depletion of the number of genes in recent sweeps at human non-infectious,  
507 mendelian disease genes compared to non-disease genes. Although more work is now needed,  
508 the lack of sweeps at disease genes already favors specific evolutionary processes over others.  
509 For example, it makes it unlikely that past adaptations increasing the occurrence of disease  
510 variants through hitchhiking would be the dominant process linking disease and adaptation at the  
511 gene level. The lack of sweeps at disease genes also seems to be unrelated to any difference in  
512 mutation accumulation between disease and non-disease genes, since we find no sign of a  
513 difference in mutation rates between the two categories of genes in the first place, and since we  
514 match metrics accounting for mutation rate in our comparisons (for example, GC content and  
515 pS). Instead, a lack of sweeps, once selective constraint has been controlled for, seems to favor a  
516 relationship involving a lag of adaptation at disease genes beyond simple constraint (measured  
517 by the amount of deleterious mutations that are removed).

518

519 Multiple mechanisms might explain such a lag of adaptation. A first possible hypothesis is that  
520 disease genes are genes that can be sensitive to the environment and whose fitness optimum can  
521 change during evolution when the environment changes. However, when this happens,  
522 adaptation then might take more time to chase the new optimum. Although higher pleiotropy is a  
523 tempting hypothesis to explain such a lag (Otto, 2004), genes involved in multiple diseases do  
524 not have a particularly pronounced sweep depletion compared to genes associated with only one  
525 disease. Completely excluding pleiotropy may however require more effort, notably by  
526 considering measures of pleiotropy other than the number of diseases a gene has been associated  
527 with.

528

529 Another hypothesis is that disease genes may have a distribution of deleterious fitness effects  
530 that is different from other genes, but that the metrics of constraint that we used do not capture  
531 this difference. Specifically, we can imagine a case where disease genes have more currently  
532 segregating recessive deleterious variants than other genes, and where selective sweeps are  
533 impeded due to the interference of genetically linked recessive deleterious variants. The  
534 deleterious effects of these variants can reveal themselves when they hitchhike together with an  
535 advantageous variant that is just starting to increase in frequency (Assaf et al., 2015) .

536 Accordingly, we find a marked sweep depletion when restricting the comparison to disease and  
537 non-disease genes in low recombination regions of the genome and with higher numbers of  
538 disease variants (Figure 4). All these comparisons are however indirect, and we do not quantify  
539 directly the amount of recessive deleterious mutations at disease or non-disease genes. Further  
540 verifying that recessive deleterious mutations impede sweeps more at disease than non-disease  
541 genes will require showing that recessive deleterious mutations are indeed more abundant at  
542 disease genes, ideally by also estimating dominance coefficients. That said, the majority of  
543 disease variants are known to be recessive and using the number of disease variants, as done in  
544 the present study, should be a good proxy of the actual number of segregating recessive  
545 deleterious mutations. Estimating dominance may prove challenging, since it is difficult to  
546 distinguish selection coefficient changes from dominance coefficient changes (Huber et al.,  
547 2018). Again, our results provide preliminary evidence to further test in the future.

548

549 In addition to suggesting possible explanatory evolutionary scenarios, our results highlight a  
550 number of potential limitations and biases that also need to be explored in more detail. First, the  
551 lack of sweeps at disease genes suggests the possibility of a technical bias against the annotation  
552 of disease genes in sweep regions with high LD, as described in the Results. This bias is unlikely  
553 to be the dominant explanation for our results, because then we would expect a stronger sweep  
554 deficit at disease genes in Europe than in Africa, given that most disease genes were annotated in  
555 Europe. The recombination rate at disease genes is also not different from the recombination rate  
556 at non-disease genes (Figure 1). The increase of the sweep deficit when comparing disease and  
557 non-disease genes only in low recombination regions (Figure 4), where disease annotation would  
558 then be more difficult regardless of overlapping a sweep or not, also suggests that this bias is  
559 unlikely. That said, it will still be useful to further investigate in the future how much this  
560 potential bias might have contributed to our observations.

561 Second, even though more intense genetic drift seems a reasonable explanation for the less  
562 pronounced sweep deficit at disease genes in Europe and East Asia than in Africa, this claim  
563 needs to be further tested, for example with population simulations reproducing past population  
564 demographic fluctuations. Such simulations would make it possible to test whether or not past  
565 bottlenecks in ancestral Eurasian populations were strong enough to erase the sweep deficit  
566 signal at disease genes in East Asia and Europe, by swamping it with random false positive  
567 sweep signals.

568

569 Further work is also required regarding the connection between the sweep deficit and polygenic  
570 adaptation not leaving hitchhiking signals. Our results could be explained by a general lack of  
571 adaptation at disease genes, or instead by a different balance between sweeps and polygenic  
572 adaptation at disease genes, with less sweeps but more polygenic adaptation that would be less  
573 affected by interference with deleterious variants. It may be possible to use recent polygenic  
574 adaptation quantification tools such as PALM (Stern et al., 2021) to compare its prevalence at  
575 disease and non-disease genes.

576

577 Finally, there are multiple directions to further analyze the sweep deficit at disease genes that we  
578 have not explored in this manuscript. For instance, analyzing the sweep deficit as a function of  
579 the time of onset of diseases (early or late in life), might further provide clues to why the sweep

580 deficit exists in the first place. Preliminary comparison of the sweep deficit at specific MeSH  
581 disease classes (Figure 5) with known early (congenital diseases) or mostly late onsets (cancer,  
582 cardiovascular) however suggests that the average onset time of diseases might not make much  
583 of a difference.

584

585 In conclusion, although our analysis reveals a strong deficit of selective sweeps at human disease  
586 genes, it also suggests that more work is needed to better understand the evolutionary processes  
587 at work, and the biases that may have skewed our interpretations. Despite these limitations, our  
588 comparison nevertheless already suggests that specific evolutionary relationships between  
589 disease genes and adaptation might be more prevalent than others, especially interference  
590 between recessive deleterious and adaptive variants. As an important follow-up question, it may  
591 now be important to ask how the sweep deficit at disease genes might have hidden interesting  
592 adaptive patterns in previous functional enrichment analyses, especially in gene functions that  
593 are often annotated based on disease evidence in the first place. For example, metabolic genes  
594 are believed to be of particular interest for adaptation to climate change. But metabolic genes are  
595 often found due to their role in metabolic disorders, and a strong representation of disease genes  
596 among all metabolic genes could then in theory mask any sweep enrichment. A sweep  
597 enrichment at metabolic genes might only become visible once controlling for the proportion of  
598 disease genes, in addition to the list of controls that we already use in the present analysis  
599 (Methods). Our results thus highlight the complexity of studying functional patterns of  
600 adaptation in the human genome.

601

602

603

604

605

606

607

608

609

610

## 611 **Methods**

### 612 **Disease gene lists**

613 We consider genes that are known to be associated with diseases as disease genes. We focus on  
614 protein-coding genes associated with human mendelian non-infectious diseases. Complex  
615 diseases are associated with several loci and environmental factors. Patterns of positive selection  
616 at complex disease and mendelian disease genes may differ (Blekhman et al., 2008), which is  
617 why we restrict our analysis to mendelian disease genes. We also restrict our analyses to non-  
618 infectious disease genes, since interactions with pathogens are an entirely different problem. We  
619 nevertheless control for the proportion of genes that are immune genes or interact with viruses  
620 (see below), since it has been shown that immune genes and interactions with viruses drive a  
621 large proportion of genomic adaptation in humans (Enard et al., 2016; Castellano et al., 2019).  
622 Therefore, different proportions of immune and virus-interacting genes between disease and non-  
623 disease genes might confound their comparison. Moreover, although diseases can be associated  
624 with non-coding genes, we only use protein-coding genes. We curate disease genes defined as  
625 genes associated with diseases according to both DisGeNet (Piñero et al., 2020) and OMIM  
626 (Amberger et al., 2019), to ensure that we focus on high-confidence disease genes. DisGeNet is a  
627 comprehensive database including gene-disease associations (GDAs) from many sources. In  
628 order to get disease genes with high confidence, we further only use GDAs curated by UniProt.  
629 These gene-disease associations are extracted and carefully curated from the scientific literature  
630 and the OMIM (Online Mendelian Inheritance in Man) database, which reports phenotypes  
631 either mendelian or possibly mendelian (Amberger et al., 2019). We also exclude all genes  
632 associated with infectious diseases according to MeSH annotation (disease class C01). In the  
633 end, we curate 4215 non-infectious mendelian disease genes from DisGeNet also curated by  
634 OMIM and Uniprot. Although we rely on GDAs from Uniprot to curate high-quality disease  
635 genes, we also include GDAs of DisGeNet from other sources when classifying disease genes  
636 into different MeSH classes and measuring pleiotropy, as long as a disease gene has at least one  
637 GDA curated by OMIM and Uniprot. We completely exclude GDAs that are only reported by  
638 CTD (Comparative Toxicogenomics Database) (Davis et al., 2021) in this study. This is because  
639 CTD includes a broad range of chemical-induced diseases that might only happen where people  
640 are exposed to these chemicals, especially some inorganic chemicals that may not be present in  
641 natural environments (Davis et al., 2021).

642

643 In order to study different types of diseases, we also divide disease genes into different  
644 classes according to the annotated MeSH classes in DisGeNet (Piñero et al., 2020). Those  
645 diseases without MeSH class are annotated as “unclassified”. Genes belonging to more than one  
646 MeSH class are counted in each MeSH class where they are present. MeSH classes including  
647 less than 50 genes are not considered in this study. We classify all the non-infectious disease  
648 genes into 22 MeSH classes including Neoplasms (C04), Musculoskeletal Diseases (C05),  
649 Digestive System Diseases (C06), Stomatognathic Diseases (C07), Respiratory Tract Diseases  
650 (C08), Otorhinolaryngologic Diseases (C09), Nervous System Diseases (C10), Eye Diseases  
651 (C11), Male Urogenital Disease (C12), Female Urogenital Diseases and Pregnancy  
652 Complications (C13), Cardiovascular Diseases (C14), Hemic and Lymphatic (C15), Congenital,  
653 Hereditary, and Neonatal Diseases and Abnormalities (C16), Skin and Connective Tissue  
654 Diseases (C17), Nutritional and Metabolic Diseases (C18), Endocrine System Diseases (C19),  
655 Immune System Diseases (C20), Mental Disorders (F03) and "unclassified".

656

### 657 **Detecting selection signals at human genes**

658 All the analyses were conducted human genome version hg19. We use two different methods to  
659 detect selective sweeps in human populations: iHS (integrated Haplotype Score, Voight et al.,  
660 2006) and  $nS_L$  (Ferrer-Admetlla et al., 2014). Both approaches are haplotype-based statistics  
661 calculated with polymorphism data. We use human genome data from the 1,000 Genomes  
662 Project phase 3, which includes 2,504 individuals from 26 populations (The 1000 Genomes  
663 Project Consortium, 2015).

664 We measure iHS and  $nS_L$  in windows centered on human coding genes (i.e. windows  
665 whose center is located half-way between the most upstream transcript start site and most  
666 downstream transcript stop site of protein coding genes). We use windows of sizes ranging from  
667 50 kb to 1,000 kb (50kb, 100kb, 200kb, 500kb and 1,000kb) since we do not want to presuppose  
668 of the size of sweeps, and since the size of the selective sweeps may vary between different  
669 genes. Moreover, to avoid any preconception related to the expected strength or number of  
670 sweep signals, we use a moving rank threshold strategy to measure the enrichment or deficit in  
671 sweeps at disease genes. For example, we select the top 500 genes with the stronger sweep  
672 signals according to a specific statistic (iHS or  $nS_L$ ). We then compare the number of diseases

673 and non-disease genes within the top 500 genes with the strongest  $iHS$  or  $nS_L$  signals. This was  
674 repeated for different top thresholds and the corresponding ranks from top 5,000 to top 10  
675 (Figure 3). Genes are ranked based on the average  $iHS$  or  $nS_L$  in their gene centered windows.  
676 Both  $iHS$  and  $nS_L$  measure, individually for each SNP in the genome, how much larger  
677 haplotypes linked to the derived SNP allele are compared to haplotypes linked to the ancestral  
678 allele (Voight et al., 2006; Ferrer-Admetlla et al., 2014). For each window, we measure the  
679 average of the absolute value of  $iHS$  or  $nS_L$  over all the SNPs in that window with an  $iHS$  or  $nS_L$   
680 value. The average  $iHS$  or  $nS_L$  values in a window provide high power to detect recent select  
681 sweeps (Enard and Petrov, 2020).

682

### 683 **Comparing recent adaptation between disease and non-disease genes**

684 We use a previously developed gene-set enrichment analysis pipeline to compare recent  
685 adaptation between disease and non-disease genes (Enard and Petrov, 2020)  
686 ([https://github.com/DavidPierreEnard/Gene\\_Set\\_Enrichment\\_Pipeline](https://github.com/DavidPierreEnard/Gene_Set_Enrichment_Pipeline)). This pipeline includes  
687 two parts. The first part is a bootstrap test that estimates the whole sweep enrichment or  
688 depletion curve at genes of interest (disease genes in our case). The second part is a false positive  
689 risk (also known as false discovery rate in the context of multiple testing) that estimates the  
690 statistical significance of the whole sweep enrichment curve using block-randomized genomes.

691

692 To compare disease and non-disease genes, we first need to select control non-disease genes that  
693 are sufficiently far away from disease genes. In that way, we avoid using as controls non-disease  
694 genes that overlap the same sweeps as neighboring disease genes, thus resulting in an  
695 underpowered comparison. The question is then how far do we need to choose non-disease  
696 control genes? Ideally, we would choose non-disease control genes as far as possible from  
697 disease genes in the human genome, further than the size of the largest known sweeps (for  
698 example the lactase sweep), which would be on the order of a megabase. However, because there  
699 are many disease genes in our dataset (4,215), there are very few non-disease genes in the human  
700 genome that are more than one megabase away from the closest disease gene. This is a problem,  
701 because the available number of potential control non-disease genes is an important parameter  
702 that can affect both the type I error, false positive rate, and type II error, false negative rate of the  
703 disease vs. non-disease genes comparison. Indeed, the smaller the control set, the more likely it



704 is to deviate from being representative of the true null expectation at non-disease genes. The  
705 noise associated with a small sample could go either way. Either the small control sample  
706 happens by chance to have less sweeps, and the bootstrap test we use to compare disease and  
707 non-disease genes will become too liberal to detect sweep enrichments, and too conservative to  
708 detect sweep deficits. Or the small control sample happens by chance to have more sweeps than  
709 a larger control sample would, and the bootstrap test becomes too conservative to detect sweep  
710 enrichments, and too liberal to detect sweep deficits.

711 After trying distances between disease genes and control disease genes of 100kb, 200kb, 300kb,  
712 400kb and 500kb, we find that the sweep deficit observed at disease genes increases steadily  
713 from 100kb to 300kb (Table 1), showing that 100kb or 200kb are likely insufficient distances.  
714 Further than 300kb at 400kb, we do not observe much stronger sweep deficits than at 300kb,  
715 while at the same time the risks of type I and type II errors keep increasing due to shrinking non-  
716 disease genes control sets. This would translate in a decreased power to possibly exclude the null  
717 hypothesis of no sweep enrichment or deficit in the second part of the pipeline, when estimating  
718 the actual pipeline FPR. Because of this, we set the required distance of potential control non-  
719 disease genes from disease genes at 300kb. This is also the distance where there are still  
720 approximately as many control genes (3455) as there are disease genes that we can use for the  
721 comparison (3030; those genes out of the 4,215 disease genes with sweep data and data for all  
722 the confounding factors).

723

724

| minimal distance | sweep deficit |
|------------------|---------------|
| 100kb            | -20889        |
| 200kb            | -35009        |
| 300kb            | -68928        |
| 400kb            | -88546        |

725 **Table 1. Sweep deficit as a function of the minimal distance of control non-disease genes.**

726 The sweep deficit is measured by the FPR score, that is the cumulative difference between the  
727 number of genes in sweeps at disease and control non-disease genes, across window sizes, sweep  
728 summary statistics, and African populations (see the rest of the Methods).

729

730

731 Another important aspect of the bootstrap test (first part of the pipeline), aside from setting up  
732 the minimal distance of the control non-disease genes, is the matching of potential confounding  
733 factors likely to influence sweep occurrence. We choose non-disease control genes that have the  
734 same confounding factors characteristics as disease genes (for example, control non-disease  
735 genes that have the same gene expression level across tissues as disease genes). The precise  
736 matching algorithm is detailed in Enard & Petrov (2020).

737 When comparing disease and non-disease genes with the bootstrap test, we control for the  
738 following potential confounding factors that could influence the occurrence of sweeps at genes:

- 739 ● Average overall expression in 53 GTEx v7 tissues (The GTEx Consortium, 2015)  
740 (<https://www.gtexportal.org/home/>). We used the log (in base 2) of TPM (Transcripts Per  
741 Million).
- 742 ● Expression (log base 2 of TPM) in GTEx lymphocytes. Expression in immune tissues  
743 may impact the rate of sweeps.
- 744 ● Expression (log base 2 of TPM) in GTEx testis. Expression in testis might also impact the  
745 rate of sweeps.
- 746 ● deCode recombination rates 50kb and 500kb: recombination is expected to have a strong  
747 impact on  $iHS$  and  $nS_L$  values, with larger, easier to detect sweeps in low recombination  
748 regions but also more false positive sweeps signals. The average recombination rates in  
749 the gene-centered windows are calculated using the most recent deCode recombination  
750 map (Halldorsson et al., 2019). We use both 50kb and 500kb window estimates to  
751 account for the effect of varying window sizes on the estimation of this confounding  
752 factor (same logic for other factors where we also use both 50kb and 500kb windows).
- 753 ● GC content is calculated as a percentage per window in 50kb and 500kb windows. It is  
754 obtained from the USCS Genome Browser (Kent et al., 2002).
- 755 ● The density of coding sequences in 50kb and 500kb windows centered on genes. The  
756 density is calculated as the proportion of coding bases respect to the whole length of the  
757 window. Coding sequences are Ensembl v99 coding sequences.
- 758 ● The density of mammalian phastCons conserved elements (Siepel et al., 2005) (in 50kb  
759 and 500k windows), downloaded from the UCSC Genome Browser (Kent et al., 2002).  
760 We used a threshold considering 10% of genome as conserved, as it is unlikely that more  
761 than 10% of the whole genome is constrained according to previous evidence (Siepel et

762 al., 2005). Given that each conserved segment had a score, we considered those segments  
763 above the 10% threshold as conserved.

- 764 ● The density of regulatory elements, as measured by the density of DNASE1  
765 hypersensitive sites (in 50kb and 500kb windows) also from the UCSC Genome Browser  
766 (Kent et al., 2002).
- 767 ● The number of protein-protein interactions (PPIs) in the human protein interaction  
768 network (Luisi et al., 2015). The number of PPIs has been shown to influence the rate of  
769 sweeps (Luisi et al., 2015). We use the log (base 2) of the number of PPIs.
- 770 ● The gene genomic length, i.e. the distance between the most upstream and the most  
771 downstream transcription start sites.
- 772 ● The number of gene neighbors in a 50kb window, and the same number in 500kb window  
773 centered on the focal genes: it is the number of coding genes within 25kb or within  
774 250kb.
- 775 ● The number of viruses that interact with a specific gene (Enard and Petrov, 2020).
- 776 ● The proportion of immune genes. The matched control sets have the same proportion of  
777 immune genes as disease genes, immune genes being genes annotated with the Gene  
778 Ontology terms GO:0002376 (immune system process), GO:0006952 (defense response)  
779 and/or GO:0006955 (immune response) as of May 2020 (Gene Ontology Consortium,  
780 2021).
- 781 ● The average number of non-synonymous variants PN in African populations, and the  
782 number of synonymous variants PS. We matched PN to build control sets of non-disease  
783 genes with the same average amount of strong purifying selection as disease genes. Also,  
784 PS can be a proxy for mutation rate and we can build control sets of non-disease genes  
785 with similar level of mutation rates.
- 786 ● McVicker's B value which can be used to account for the effect of background selection  
787 on rates of adaptation and especially weak adaptation (McVicker et al., 2009).

788

789 Similar to the selection of control genes far enough from disease genes, the matching of many  
790 confounding factors decreases the number of non-disease genes that can effectively be used as  
791 controls. This further increases the risk of type I and type II errors of the bootstrap test, as  
792 previously described. In addition, the bootstrap test only provides p-value for each tested sweep

793 rank threshold separately, in the whole enrichment (or deficit) curve (Figure 2). It does not  
794 provide any estimate of the significance of the whole curve, which is needed to estimate the  
795 significance of a sweep enrichment or deficit without making too many assumptions on how  
796 many sweeps are expected or how strong they are.

797 To address the increased type I and type II error risks of the bootstrap test, as well to get an  
798 unbiased significance estimate for whole enrichment curves, the second part of our pipeline  
799 conducts a false positive risk analysis based on block-randomized genomes (Enard and Petrov,  
800 2020). Briefly, we re-estimate many whole enrichment curves reusing the same disease and  
801 control non-disease genes used in the first part of the pipeline by the bootstrap test, but after  
802 having randomly shuffled the locations of genes or clusters of neighboring genes in sweeps at  
803 those disease and control non-disease genes. To do this, we order the disease and control non-  
804 disease genes as they appear in the genome. We then define blocks of neighboring genes, whose  
805 limits do not interrupt clusters of genes in the same putative sweep. Then, we randomly shuffle  
806 the order of these blocks. Because we do not cut any cluster of genes that might be in the same  
807 sweep, the resulting block-randomized genomes preserve the same clustering of the genes in the  
808 same putative sweeps as in the real genome. With this approach, we look at the exact same set of  
809 disease and control non-disease genes and just shuffle sweep locations between them. Thus, by  
810 using many block-randomized genomes, we can estimate the null expected range of whole  
811 enrichment curves while fully accounting for the extra variance expected from having a limited  
812 sample of control non-disease genes. We can then estimate a false positive risk (FPR) for the  
813 whole enrichment or deficit curve by comparing the real observed one with the distribution of  
814 random curves generated with block-randomized genomes.

815  
816 To measure the FPR for a curve, we need to define a metric to compare the real curve with the  
817 randomly generated ones. In figure 1, we show relative enrichments at each sweep rank  
818 threshold, the number of disease genes in sweeps divided by the number of control non-disease  
819 genes in sweeps. As a summary metric for the curve, we could then use the sum of the relative  
820 enrichments over all thresholds. However, the issue with this approach is that a relative  
821 enrichment is the same whether we have 2 disease genes in sweeps and one control non-disease  
822 gene in sweeps, or we have 200 disease genes in sweeps and 100 control non-disease genes in  
823 sweeps. Thus, although relative enrichments are convenient for visualization on a figure, they are

824 not adequate to measure the FPR. Instead of the relative enrichment, we use the difference  
825 between disease and non-disease genes, that is, the number of disease genes in sweeps, minus the  
826 average number of control non-disease genes across control sets built by the bootstrap test. We  
827 then use as a metric for a whole curve the sum of differences over all the rank thresholds. We use  
828 this sum of differences to estimate the enrichment or deficit curve FPR, as the proportion of  
829 block-randomized genomes where the sum of differences exceeds the observed sum of  
830 differences for an enrichment (one minus this proportion for a deficit).

831  
832 Importantly, although so far we have described the case where we measure the FPR for one  
833 enrichment curve, nothing prevents us from calculating a single sum of differences over an entire  
834 group of enrichment or deficit curves. This way, we can measure a single FPR for any number of  
835 curves considered together. In our analysis, we measure a single FPR adding  $iHS$  and  $nS_L$  curves  
836 together, and also adding together the curves for 50kb, 100kb, 200kb, 500kb and 1000kb  
837 windows (ten curves in total, 2 statistics\*5 window sizes).

838  
839 **Sweep deficit at high and low recombination disease genes, and at high and low disease**  
840 **variant number disease genes**

841 To generate Figure 4, we separate disease genes in groups of approximately the same size based  
842 on their recombination rate and numbers of disease variants annotated in OMIM/Uniprot. We  
843 separate the disease genes into two groups of equal size, those with recombination lower than  
844 1.137 cM/Mb, and those with recombination higher than this value. To count the disease variants  
845 at each disease gene, we count not only the OMIM/Uniprot disease variants for that gene, but  
846 also all the other OMIM/Uniprot disease variants that occur in a 500kb window centered on that  
847 gene. We do this because the recessive deleterious variants from other nearby disease genes may  
848 also interfere with adaptation. Half of disease genes have less than five OMIM/Uniprot disease  
849 variants, and half have five or more.

850  
851 **Impact of functional differences between disease and non-disease genes on the sweep deficit**  
852 The sweep deficit at disease genes could be due to a different representation of gene functions at  
853 disease genes compared to control non-disease genes. In this case, disease genes would have less  
854 adaptation not because they are disease genes, but because the gene functions that are enriched

855 among disease genes compared to non-disease happen to experience less adaptation. We can test  
856 this possibility using Gene Ontology (GO) (Gene Ontology Consortium, 2021) functional  
857 annotations as follows. If GO gene functions that are enriched in disease genes experience less  
858 adaptation independently of the disease status of genes, then we can predict that non-disease  
859 genes with these functions should also experience less adaptation than non-disease genes that do  
860 not have these GO functions. In total, we find that 3,097 GO annotations are enriched in disease  
861 genes compared to confounding factors-matched controls (bootstrap test  $P \leq 0.01$ ). In our dataset,  
862 half of non-disease genes have 20 or more of these GO annotations, and half have less than  
863 twenty (very few have none). We find no difference in the sweep prevalence between the two  
864 groups (20 or more annotations vs. less than 20 annotations at least 300kb away; FPR=0.15). The  
865 sweep deficit at disease genes is therefore unlikely to be due to the gene functions that are more  
866 represented in disease genes compared to controls. In addition, such a scenario would not explain  
867 the lack of sweep deficit observed at disease genes with high recombination rates and low  
868 numbers of disease variants (Figure 4).

869

## 870 **Acknowledgements**

871 We wish to thank Dan Shriver for helpful comments on the results presented in the manuscript.

872

## 873 **Author Contributions**

874 Conceived and designed the analyses: CD, DE. Performed the analyses: CD and DE. Wrote the  
875 manuscript: CD, DST and DE. Interpreted the results: CD, DST, MEL and DE.

876

## 877 **References**

878

879 Amberger JS, Bocchini CA, Scott AF, Hamosh A. 2019. OMIM.org: leveraging knowledge  
880 across phenotype-gene relationships. *Nucleic Acids Res.* 47(D1):D1038–D1043.

881 Assaf ZJ, Petrov DA, Blundell JR. 2015. Obstruction of adaptation in diploids by recessive,  
882 strongly deleterious alleles. *Proc. Natl. Acad. Sci. U. S. A.* 112 (20):E2658-E2666.

883 Barreiro LB, Quintana-Murci L. 2010. From evolutionary genetics to human immunology: how  
884 selection shapes host defence genes. *Nat. Rev. Genet.* 11(1):17–30.

885 Birky CW, Walsh JB. 1988. Effects of linkage on rates of molecular evolution. *Proc. Natl. Acad.  
886 Sci. U. S. A.* 85:6414–6418.

- 887 Blekhman R, Man O, Herrmann L, Boyko AR, Indap A, Kosiol C, Bustamante CD, Teshima  
888 KM, Przeworski M. 2008. Natural Selection on Genes that Underlie Human Disease  
889 Susceptibility. *Curr. Biol.* 18(12):883–889.
- 890 Castellano D, Uricchio LH, Munch K, Enard D. 2019. Viruses rule over adaptation in conserved  
891 human proteins. *bioRxiv*, 555060.
- 892 Chun S, Fay JC. 2011. Evidence for Hitchhiking of Deleterious Mutations within the Human  
893 Genome. *PLoS Genet.* 7(8): e1002240.
- 894 Davis AP, Grondin CJ, Johnson RJ, Sciaky D, Wieggers J, Wieggers TC, Mattingly CJ. 2021.  
895 Comparative Toxicogenomics Database (CTD): update 2021. *Nucleic Acids Res.*  
896 49(D1):D1138–D1143.
- 897 Enard D, Cai L, Gwennap C, Petrov DA. 2016. Viruses are a dominant driver of protein  
898 adaptation in mammals. *eLife* 5: e12469.
- 899 Enard D, Messer PW, Petrov DA. 2014. Genome-wide signals of positive selection in human  
900 evolution. *Genome Res.* 24(6):885-95.
- 901 Enard D, Petrov DA. 2020. Ancient RNA virus epidemics through the lens of recent adaptation  
902 in human genomes. *Philos. Trans. R. Soc. B Biol. Sci.* 375:20190575.
- 903 Eyre-Walker YC, Eyre-Walker A. 2014. The Role of Mutation Rate Variation and Genetic  
904 Diversity in the Architecture of Human Disease. *PLoS One* 9(2):e90166.
- 905 Ferrer-Admetlla A, Liang M, Korneliussen T, Nielsen R. 2014. On detecting incomplete soft or  
906 hard selective sweeps using haplotype structure. *Mol. Biol. Evol.* 31(5):1275–1291.
- 907 Gene Ontology Consortium. 2021. The Gene Ontology resource: enriching a GOld mine.  
908 *Nucleic Acids Res.* 49(D1):D325–D334.
- 909 Halldorsson B V, Palsson G, Stefansson OA, Jonsson H, Hardarson MT, Eggertsson HP,  
910 Gunnarsson B, Oddsson A, Halldorsson GH, Zink F, et al. 2019. Characterizing mutagenic  
911 effects of recombination through a sequence-level genetic map. *Science*  
912 363(6425):eaau1043.
- 913 Hill WG, Robertson A. 1966. The effect of linkage on limits to artificial selection. *Genet. Res.*  
914 8(3):269–294.
- 915 Huber CD, Durvasula A, Hancock AM, Lohmueller KE. 2018. Gene expression drives the  
916 evolution of dominance. *Nat. Commun.* 9:2750.
- 917 Ittisoponpisan S, Alhuzimi E, Sternberg MJE, David A. 2017. Landscape of Pleiotropic Proteins

- 918           Causing Human Disease: Structural and System Biology Insights. *Hum. Mutat.* 38(3):289–  
919           296.
- 920 Jain K. 2019. Interference Effects of Deleterious and Beneficial Mutations in Large Asexual  
921           Populations. *Genetics* 211(4):1357–1369.
- 922 Johnson T, Barton NH. 2002. The effect of deleterious alleles on adaptation in asexual  
923           populations. *Genetics* 162(1):395–411.
- 924 Kent WJ, Sugnet CW, Furey TS, Roskin KM, Pringle TH, Zahler AM, Haussler D. 2002. The  
925           human genome browser at UCSC. *Genome Res.* 12(6):996–1006.
- 926 Kim PM, Korbel JO, Gerstein MB. 2007. Positive selection at the protein network periphery:  
927           Evaluation in terms of structural constraints and cellular context. *Proc. Natl. Acad. Sci. U.*  
928           *S. A.* 104(51):20274–20279.
- 929 Luisi, P., Alvarez-Ponce, D., Pybus, M., Fares, M. A., Bertranpetit, J., & Laayouni, H. 2015.  
930           Recent positive selection has acted on genes encoding proteins with more interactions  
931           within the whole human interactome. *Genome Bio. Evol.* 7(4):1141–1154.
- 932 McVicker G, Gordon D, Davis C, Green P. 2009. Widespread genomic signatures of natural  
933           selection in hominid evolution. *PLoS Genet.* 5: e1000471.
- 934 Osada N, Mano S, Gojobori J. 2009. Quantifying dominance and deleterious effect on human  
935           disease genes. *Proc. Natl. Acad. Sci. U. S. A.* 106(3):841 – 846.
- 936 Otto SP. 2004. Two steps forward, one step back: the pleiotropic effects of favoured alleles.  
937           *Proc. Biol. Sci.* 271(1540):705–714.
- 938 Park S, Yang JS, Kim J, Shin YE, Hwang J, Park J, Jang SK, Kim S. 2012. Evolutionary history  
939           of human disease genes reveals phenotypic connections and comorbidity among genetic  
940           diseases. *Sci. Rep.* 2:757.
- 941 Peck JR. 1994. A ruby in the rubbish: beneficial mutations, deleterious mutations and the  
942           evolution of sex. *Genetics* 137(2):597–606.
- 943 Piñero J, Ramírez-Anguita JM, Saüch-Pitarch J, Ronzano F, Centeno E, Sanz F, Furlong LI.  
944           2020. The DisGeNET knowledge platform for disease genomics: 2019 update. *Nucleic*  
945           *Acids Res.* 48(D1):D845–D855.
- 946 Quintana-murci L. 2016. Understanding rare and common diseases in the context of human  
947           evolution. *Genome Biol.* 17:225.
- 948 Schrider DR. 2020. Background Selection Does Not Mimic the Patterns of Genetic Diversity



- 949 Produced by Selective Sweeps. *Genetics* 216(2): 499-519.
- 950 Siepel, A., Bejerano, G., Pedersen, J. S., Hinrichs, A. S., Hou, M., Rosenbloom, K., Clawson, H.,  
951 Spieth, J., Hillier, L. W., Richards, S., Weinstock, G. M., Wilson, R. K., Gibbs, R. A., Kent,  
952 W. J., Miller, W., & Haussler, D. 2005. Evolutionarily conserved elements in vertebrate,  
953 insect, worm, and yeast genomes. *Genome Res.* 15(8):1034–1050.
- 954 Smith JM. 1976. What Determines the Rate of Evolution? *Am. Nat.* 110(973):331–338.
- 955 Smith JM, Haigh J. 1974. The hitch-hiking effect of a favourable gene. *Genet. Res.* 23:23–35.
- 956 Smith NGC, Eyre-Walker A. 2003. What Determines the Rate of Evolution? *Gene* 318:169–175.
- 957 Spataro N, Rodríguez JA, Navarro A, Bosch E. 2017. Properties of human disease genes and the  
958 role of genes linked to Mendelian disorders in complex disease aetiology. *Hum. Mol. Genet.*  
959 26(3):489–500.
- 960 Stern AJ, Speidel L, Zaitlen NA, Nielsen R. 2021. Disentangling selection on genetically  
961 correlated polygenic traits via whole-genome genealogies. *Am. J. Hum. Genet.* 108(2):219–  
962 239.
- 963 The 1000 Genomes Project Consortium. 2015. A global reference for human genetic variation.  
964 *Nature* 526:68–74.
- 965 The GTEx Consortium. The Genotype-Tissue Expression (GTEx) pilot analysis: Multitissue  
966 gene regulation in humans. 2015. *Science.* 348(6235):648-660
- 967 Uricchio LH, Petrov DA, Enard D. 2019. Exploiting selection at linked sites to infer the rate and  
968 strength of adaptation. *Nat. Ecol. Evol.* 3:977–984.
- 969 Voight BF, Kudaravalli S, Wen X, Pritchard JK. 2006. A map of recent positive selection in the  
970 human genome. *PLoS Biol.* 4(3):e72.
- 971 Xu J, Zhang J. 2014. Why Human Disease-Associated Residues Appear as the Wild-Type in  
972 Other Species: Genome-Scale Structural Evidence for the Compensation Hypothesis. *Mol.*  
973 *Biol. Evol.* 31(7):1787–1792.
